# Supplementary material for: Leveraging transcriptional dynamics to improve BRAF inhibitor responses in melanoma
Source: PubMed Central journal article supplement — eBioMedicine. 2019 Oct 5;48:178–90. doi: 10.1016/j.ebiom.2019.09.023 (PMC6838387; doi:10.1016/j.ebiom.2019.09.023), 2019-10-05
Supplement: mmc2.pdf [file mmc2.pdf]

| Gene Symbol | Entrex Gene ID | Assay Name       | Delta Gene Assay ID |
|-------------|----------------|------------------|---------------------|
| ACTB        | 60             | ACTB_55733_i2    | GEP00055733         |
| AKT1        | 207            | AKT1_56318_i6    | GEP00056318         |
| AKT2        | 208            | AKT2_12963_i9    | GEP00012963         |
| AKT3        | 10000          | AKT3_12964_i8    | GEA00012964         |
| AR          | 367            | AR_56321_i3      | GEP00056321         |
| ARNT        | 405            | ARNT_62415_i11   | GEP00062415         |
| ATF1        | 466            | ATF1_13524_i2    | GEA00013524         |
| ATF2        | 1386           | ATF2_56453_i0    | GEP00056453         |
| ATF3        | 467            | ATF3_57695_i1    | GEP00057695         |
| ATF4        | 468            | ATF4_59442_i0    | GEP00059442         |
| ATG13       | 9776           | ATG13_31663_i3   | GEA00031663         |
| AXL         | 558            | Axl_32783_i12    | GEA00032783         |
| BCL2L11     | 10018          | BCL2L11_60608_e1 | GEP00060608         |
| BRAF        | 673            | Braf_12403_i7    | GEA00012403         |
| CCND1       | 595            | CCND1_55725_i1   | GEP00055725         |
| CDH2        | 1000           | CDH2_56054_i2    | GEP00056054         |
| CDKN1B      | 1027           | CDKN1B_56333_i0  | GEP00056333         |
| CEBPA       | 1050           | CEBPA_55194_e0   | GEP00055194         |
| CEBPB       | 1051           | CEBPB_12385_e0   | GEA00012385         |
| CREB1       | 1385           | CREB1_13568_i4   | GEA00013568         |
| CREBBP      | 1387           | CREBBP_12187_i4  | GEA00012187         |
| CTNNB1      | 1499           | CTNNB1_55724_i6  | GEP00055724         |
| DR1         | 1810           | DR1_13588_i0     | GEA00013588         |
| E2F1        | 1869           | E2F1_12379_i2    | GEA00012379         |
| E2F6        | 1876           | E2F6_62414_i7    | GEP00062414         |
| EGFR        | 1956           | EGFR_55803_i3    | GEP00055803         |
| EGR1        | 1958           | EGR1_56431_i0    | GEP00056431         |
| ELK1        | 2002           | ELK1_59688_i2    | GEP00059688         |
| ERBB2       | 2064           | ERBB2_6261_i10   | GEA00006261         |
| ERBB3       | 2065           | ERBB3_55836_i1   | GEP00055836         |
| ETS1        | 2113           | ETS1_12481_i6    | GEA00012481         |
| ETS2        | 2114           | ETS2_57383_i2    | GEP00057383         |
| FCGR1A      | 2209           | FCGR1A_62412_e2  | GEP00062412         |
| FN1         | 2335           | FN1_7778_i3      | GEA00007778         |
| FOS         | 2353           | FOS_56350_i0     | GEP00056350         |
| FOXO1       | 2308           | FOXO1_13606_i1   | GEA00013606         |
| FOXO3       | 2309           | FOXO3_61220_e0   | GEP00061220         |
| GAPDH       | 2597           | GAPDH_55153_i3   | GEP00055153         |
| HADHA       | 3030           | HADHA_62416_i15  | GEP00062416         |
| HDAC1       | 3065           | HDAC1_55867_i10  | GEP00055867         |
| HIF1A       | 3091           | HIF1A_12495_i5   | GEA00012495         |
| HSF1        | 3297           | HSF1_13655_i8    | GEA00013655         |
| ID1         | 3397           | ID1_13663_e0     | GEA00013663         |
| IRF1        | 3659           | IRF1_13682_i2    | GEA00013682         |

| Gene Symbol | Entrex Gene ID | Assay Name       | Delta Gene Assay ID |
|-------------|----------------|------------------|---------------------|
| ITGA5       | 3678           | ITGA5_32624_i3   | GEA00032624         |
| ITGAV       | 3685           | ITGAV_13692_i17  | GEA00013692         |
| ITGB1       | 3688           | ITGB1_56418_i2   | GEP00056418         |
| ITGB3       | 3690           | ITGB3_29570_i5   | GEA00029570         |
| JUN         | 3725           | JUN_12227_e0     | GEA00012227         |
| LDHA        | 3939           | LDHA_55719_i3    | GEP00055719         |
| MAP2K1      | 5604           | MAP2K1_13044_i4  | GEA00013044         |
| MAP2K2      | 5605           | MAP2K2_13045_i7  | GEA00013045         |
| MAPK1       | 5594           | MAPK1_12736_i3   | GEA00012736         |
| MAPK3       | 5595           | MAPK3_60769_e1   | GEP00060769         |
| MCL1        | 4170           | MCL1_13705_e2    | GEA00013705         |
| MET         | 4233           | MET_55841_i11    | GEP00055841         |
| MITF        | 4286           | MITF_61019_i2    | GEP00061019         |
| MYC         | 4609           | MYC_51751_i1     | GEA00051751         |
| NFKB1       | 4790           | NFKB1_56435_i4   | GEP00056435         |
| ORMDL1      | 94101          | ORMDL1_18687_i1  | GEA00018687         |
| PIK3CA      | 5290           | PIK3CA_56385_i17 | GEP00056385         |
| PPRA        | 5465           | PPARA_57488_i4   | GEP00057488         |
| PTEN        | 5728           | PTEN_56392_i0    | GEP00056392         |
| PXN         | 5829           | PXN_27275_i4     | GEA00027275         |
| RAF1        | 5894           | Raf1_57658_i1    | GEP00057658         |
| RB1         | 5925           | RB1_55727_i15    | GEP00055727         |
| REL         | 5966           | REL_59441_i4     | GEP00059441         |
| RELA        | 5970           | RELA_56472_i6    | GEP00056472         |
| RELB        | 5971           | RELB_13772_i6    | GEA00013772         |
| RPP21       | 79897          | RPP21_62413_i2   | GEP00062413         |
| SMAD1       | 4086           | SMAD1_56642_i1   | GEP00056642         |
| SMAD4       | 4089           | SMAD4_56993_i6   | GEP00056993         |
| SMAD5       | 4090           | SMAD5_12567_i6   | GEA00012567         |
| SMAD9       | 4093           | SMAD9_12574_i4   | GEA00012574         |
| SP1         | 6667           | SP1_56643_i4     | GEP00056643         |
| SP3         | 6670           | SP3_13792_i3     | GEA00013792         |
| SRF         | 6722           | SRF_23819_i4     | GEA00023819         |
| STAT1       | 6772           | STAT1_56036_i14  | GEP00056036         |
| STAT2       | 6773           | STAT2_57379_i7   | GEP00057379         |
| STAT3       | 6774           | STAT3_12324_i22  | GEA00012324         |
| STAT5B      | 6777           | STAT5B_13092_i3  | GEA00013092         |
| STAT6       | 6778           | STAT6_12572_i12  | GEA00012572         |
| T53         | 7157           | TP53_56655_i6    | GEP00056655         |
| UBE2K       | 3093           | UBE2K_21521_i3   | GEA00021521         |
| ULK1        | 8408           | ULK1_60547_i24   | GEP00060547         |
| VIM         | 7431           | VIM_7475_i5      | GEA00007475         |
| WEE1        | 7465           | Wee1_59903_i7    | GEP00059903         |
| XIAP        | 331            | XIAP_61874_i1    | GEP00061874         |

**Supplemental Table 1.** Delta Gene Assays used for gene expression analysis of single cells with Fluidigm BioMark HD.

| Sample  | # of Cells | State 1 | State 2 | State 3 | State 4 |
|---------|------------|---------|---------|---------|---------|
| WM164   | 73         | 66      | 5       | 0       | 2       |
| WM164R  | 78         | 3       | 64      | 3       | 8       |
| 1205Lu  | 71         | 0       | 36      | 35      | 0       |
| 1205LuR | 70         | 0       | 4       | 66      | 0       |
| Total   | 292        | 69      | 109     | 104     | 10      |

**Supplemental Table 2.** Distribution of cells among transcriptional states in melanoma cell lines.

| <b>Sample</b> | <b>Number of Cells Analyzed</b> | <b>Number of Genes Analyzed</b> | <b>Total Data Points</b> |
|---------------|---------------------------------|---------------------------------|--------------------------|
| WM164         | 73                              | 88                              | 6424                     |
| WM164R        | 78                              | 88                              | 6864                     |
| 1205Lu        | 71                              | 88                              | 6248                     |
| 1205LuR       | 70                              | 88                              | 6160                     |
| <b>Total</b>  | <b>292</b>                      | <b>88</b>                       | <b>25696</b>             |

**Supplemental Table 3.** Single cell gene expression data statistics.

| Cell Line | Average Doubling Time (Days) | Standard Deviation | Lower 95% CI of Mean | Upper 95% CI of Mean |
|-----------|------------------------------|--------------------|----------------------|----------------------|
| WM164     | 0.98                         | 0.11               | 0.69                 | 1.26                 |
| WM164R    | 2.13                         | 1.23               | -0.93                | 5.19                 |
| 1205Lu    | 1.18                         | 0.20               | 0.69                 | 1.68                 |
| 1205LuR   | 1.32                         | 0.25               | 0.71                 | 1.93                 |

**Supplemental Table 4.** Fitness of melanoma cell lines as determined growth rates in the absence of BRAF inhibitor. WM164 and 1205Lu and their drug-resistant (R) counterparts were grown in the absence drug for 4 days and the growth rates measured by cell counting.
